# Supplementary material
Source: PubMed Central journal article supplement (PMC3634525)
Supplement: tjp0591-2139-SD3.pdf [file tjp0591-2139-SD3.pdf]

*Supplemental Movie 1.* Movie of a WT murine popliteal lymphatic vessel demonstrating portions of the pressure step protocol and the acetylcholine dose-response protocol. Video taken during the experiment is shown at the top, and the pressure and diameter traces are shown moving simultaneously at the middle and bottom, respectively. Time is depicted on the x-axis by 30-second ticks. During the dose-response protocol, the addition of acetylcholine to the bath was marked by interrupting the light path for a fraction of a second to create the vertical lines in the diameter trace.

*Supplemental Movie 2.* Movie of an eNOS<sup>-/-</sup> murine popliteal lymphatic vessel to demonstrate portions of the pressure step protocol and the acetylcholine dose-response protocol. Video taken during the experiment is shown at the top, and the pressure and diameter traces are shown moving simultaneously at the middle and bottom, respectively. Time is depicted on the x-axis by 30-second ticks (total time is ~10 minutes). During the dose-response protocol, the addition of acetylcholine to the bath was marked by interrupting the light path for a fraction of a second to create the vertical lines in the diameter trace.
